# Supplementary material for: A plan template‐based automation solution using a commercial treatment planning system
Source: PubMed Central journal article supplement (PMC7286016; doi:10.1002/acm2.12848), 2020-03-16

## Supplementary Material

Table 1. Prescription of Prostate case.

| Organ Indices | Evaluation Criteria                         | Prescription Requests |
|---------------|---------------------------------------------|-----------------------|
| PTV6750       | Minimum Volume of PTV6750 covered by 67.5Gy | 95.0(%)               |
| PTV4750       | Minimum Volume of PTV4750 covered by 47.5Gy | 95.0(%)               |
| Rectum1       | Maximum Volume of Rectum covered by 40.0Gy  | 30.0(%)               |
| Rectum2       | Maximum Volume of Rectum covered by 50.0Gy  | 20.0(%)               |
| Rectum3       | Maximum Volume of Rectum covered by 62.5Gy  | 5.0(%)                |
| Bladder1      | Maximum Volume of Rectum covered by 40.0Gy  | 30.0(%)               |
| Bladder2      | Maximum Volume of Rectum covered by 50.0Gy  | 20.0(%)               |
| Bladder3      | Maximum Volume of Rectum covered by 60.0Gy  | 10.0(%)               |
| Femoral Head  | Maximum Dose                                | 54(Gy)                |

5

Table 2. Prescription of Head and neck case.

| Organ Indices   | Evaluation Criteria                            | Prescription Requests |
|-----------------|------------------------------------------------|-----------------------|
| PTVnx6996       | Minimum Volume of PTVnx6996 covered by 69.96Gy | 95.0(%)               |
| PTVnd6996       | Minimum Volume of PTVnd6996 covered by 69.96Gy | 95.0(%)               |
| PTV5096         | Minimum Volume of PTV5096 covered by 50.96Gy   | 95.0(%)               |
| Spinal Cord     | Maximum Dose                                   | 40.0(Gy)              |
| Cord PRV        | Maximum Dose                                   | 45.0(Gy)              |
| Brain Stem      | Maximum Dose                                   | 54.0(Gy)              |
| Stem PRV        | Maximum Dose                                   | 60.0(Gy)              |
| Len L           | Maximum Dose                                   | 9.0(Gy)               |
| Len R           | Maximum Dose                                   | 9.0(Gy)               |
| Optical Chiasm  | Maximum Dose                                   | 54.0(Gy)              |
| Optical Nerve L | Maximum Dose                                   | 54.0(Gy)              |
| Optical Nerve R | Maximum Dose                                   | 54.0(Gy)              |
| Pituitary       | Maximum Dose                                   | 54.0(Gy)              |
| TM L            | Maximum Dose                                   | 54.0(Gy)              |
| TM R            | Maximum Dose                                   | 54.0(Gy)              |
| Inner Ears      | Maximum Dose                                   | 54.0(Gy)              |
| Parotids        | Maximum Volume of Parotids covered by 50Gy     | 30.0(%)               |
| Esophagus       | Maximum Mean Dose                              | 40.0(Gy)              |
| Trachea         | Maximum Mean Dose                              | 40.0(Gy)              |
| Thyroid         | Maximum Volume of Thyroid covered by 50Gy      | 50.0(%)               |
| Mandible        | Maximum Mean Dose                              | 50.0(Gy)              |
| Oral Cavity     | Maximum Mean Dose                              | 50.0(Gy)              |
| Larynx          | Maximum Mean Dose                              | 60.0(Gy)              |
| Neck            | Maximum Dose                                   | 40.0(Gy)              |

Table 3. DVH statistics comparison of 10 prostate cases.

| Prescription                 | Clinical(mean±std) | Auto(mean±std) | P value |
|------------------------------|--------------------|----------------|---------|
| PTV6750 (V67.5Gy ≥ 95%)      | 96.35±1.76         | 95.12±0.21     | 0.063   |
| PTV4750 (V47.5Gy ≥ 95%)      | 96.14±1.37         | 96.55±0.75     | 0.285   |
| Bladder1 (V60Gy ≤ 10%)       | 6.57±6.60          | 5.37±3.88      | 0.721   |
| Bladder2 (V50Gy ≤ 20%)       | 10.65±9.40         | 10.82±8.51     | 0.878   |
| Bladder3 (V40Gy ≤ 30%)       | 24.74±9.53         | 22.65±8.61     | 0.114   |
| Rectum1 (V62.5Gy ≤ 5%)       | 2.83±2.15          | 1.63±0.97      | 0.059   |
| Rectum2 (V50Gy ≤ 20%)        | 12.79±3.65         | 9.58±4.20      | 0.092   |
| Rectum3 (V40Gy ≤ 30%)        | 26.06±5.96         | 21.42±6.40     | 0.139   |
| Pubic Bone (V62.5Gy ≤ 15%)   | 6.39±4.61          | 3.92±3.58      | 0.086   |
| Femoral Head L(Dmax ≤ 54Gy)  | 41.63±2.91         | 40.62±2.57     | 0.646   |
| Femoral Head R(Dmax ≤ 54Gy)  | 40.70±2.73         | 40.80±3.26     | 0.799   |
| Maximum Dose(Dmax ≤ 74.25Gy) | 73.00±1.10         | 73.46±1.14     | 0.203   |

Table 4. DVH statistics comparison of 10 head and neck cases.

| Prescription                    | Clinical(mean±std) | Auto(mean±std) | P value |
|---------------------------------|--------------------|----------------|---------|
| PTVnx6996 (V69.96Gy ≥ 95%)      | 96.92±1.21         | 96.02±1.57     | 0.341   |
| PTVnd6996 (V69.96y ≥ 95%)       | 98.02±1.30         | 97.01±1.80     | 0.084   |
| PTV5096(V50.96Gy ≥ 95%)         | 97.53±1.79         | 96.26±1.49     | 0.097   |
| Brain Stem (Dmax ≤ 54Gy)        | 45.85±4.47         | 42.23±5.09     | 0.160   |
| Spinal Cord (Dmax ≤ 40Gy)       | 33.63±1.53         | 28.48±4.87     | 0.027   |
| Left Len (Dmax ≤ 9Gy)           | 3.05±1.98          | 3.78±2.29      | 0.027   |
| Right Len (Dmax ≤ 9Gy)          | 3.23±1.72          | 3.73±1.98      | 0.160   |
| Left Optic Nerve (Dmax ≤ 54Gy)  | 18.96±17.10        | 19.28±18.09    | 0.846   |
| Right Optic Nerve (Dmax ≤ 54Gy) | 23.11±17.27        | 19.36±18.27    | 0.492   |
| Optic Chiasm (Dmax ≤ 54Gy)      | 21.50±16.88        | 22.77±18.68    | 0.625   |
| Parotids (V50Gy ≤ 30%)          | 29.03±10.98        | 26.96±8.58     | 0.004   |
| Esophagus (Dmean ≤ 40Gy)        | 29.74±5.19         | 31.21±6.03     | 0.322   |
| Mandible (Dmean ≤ 50Gy)         | 38.54±4.68         | 34.98±4.19     | 0.010   |
| Maximum (Dose ≤ 76.95Gy)        | 76.45±0.62         | 77.89±1.24     | 0.027   |

10

Table 5. DVH statistics comparison between Stage I (FMO) and Stage II (segmentation optimization) in 10 prostate cases.

| Prescription            | Stage I(mean±std) | Stage II(mean±std) | P value |
|-------------------------|-------------------|--------------------|---------|
| PTV6750 (V67.5Gy ≥ 95%) | 97.52±1.65        | 95.12±0.21         | 0.033   |
| PTV4750 (V47.5Gy ≥ 95%) | 99.13±0.65        | 96.55±0.75         | 0.008   |
| Bladder1 (V60Gy ≤ 10%)  | 4.71±3.52         | 5.37±3.88          | 0.260   |
| Bladder2 (V50Gy ≤ 20%)  | 10.45±8.68        | 10.82±8.51         | 0.441   |
| Bladder3 (V40Gy ≤ 30%)  | 21.86±9.78        | 22.65±8.61         | 0.110   |

|                              |            |            |       |
|------------------------------|------------|------------|-------|
| Rectum1 (V62.5Gy ≤ 5%)       | 1.52±1.12  | 1.63±0.97  | 0.953 |
| Rectum2 (V50Gy ≤ 20%)        | 7.61±3.62  | 9.58±4.20  | 0.015 |
| Rectum3 (V40Gy ≤ 30%)        | 18.23±5.71 | 21.42±6.40 | 0.038 |
| Pubic Bone (V62.5Gy ≤ 15%)   | 3.40±3.38  | 3.92±3.58  | 0.311 |
| Femoral Head L (Dmax ≤ 54Gy) | 40.31±1.97 | 40.62±2.57 | 0.953 |
| Femoral Head R (Dmax ≤ 54Gy) | 41.02±2.34 | 40.80±3.26 | 0.767 |
| Maximum (Dmax ≤ 74.25Gy)     | 71.49±1.08 | 73.46±1.14 | 0.011 |

15 Table 6. DVH statistics comparison between Stage I (FMO) and Stage II (segmentation optimization) in 10 head and neck cases.

| <b>Prescription</b>             | <b>Stage I(mean±std)</b> | <b>Stage II(mean±std)</b> | <b>P value</b> |
|---------------------------------|--------------------------|---------------------------|----------------|
| PTVnx6996 (V69.96Gy ≥ 95%)      | 98.51±1.56               | 96.02±1.57                | 0.009          |
| PTVnd6996 (V69.96y ≥ 95%)       | 98.41±1.33               | 97.01±1.80                | 0.075          |
| PTV5096(V50.96Gy ≥ 95%)         | 99.51±0.71               | 96.26±1.49                | 0.005          |
| Brain Stem (Dmax ≤ 54Gy)        | 39.34±5.73               | 42.23±5.09                | 0.013          |
| Spinal Cord (Dmax ≤ 40Gy)       | 26.83±4.14               | 28.48±4.87                | 0.047          |
| Left Len (Dmax ≤ 9Gy)           | 4.70±1.83                | 3.78±2.29                 | 0.013          |
| Right Len (Dmax ≤ 9Gy)          | 5.01±1.89                | 3.73±1.98                 | 0.009          |
| Left Optic Nerve (Dmax ≤ 54Gy)  | 23.16±16.47              | 19.28±18.09               | 0.093          |
| Right Optic Nerve (Dmax ≤ 54Gy) | 23.11±17.27              | 19.36±18.27               | 0.139          |
| Optic Chiasm (Dmax ≤ 54Gy)      | 22.42±16.65              | 22.77±18.68               | 0.059          |
| Parotids (V50Gy ≤ 30%)          | 21.03±9.00               | 26.96±8.58                | 0.005          |
| Esophagus (Dmean ≤ 40Gy)        | 31.90±5.72               | 31.21±6.03                | 0.022          |
| Mandible (Dmean ≤ 50Gy)         | 36.93±3.73               | 34.98±4.19                | 0.005          |
| Maximum (Dose ≤ 76.95Gy)        | 74.56±1.13               | 77.89±1.24                | 0.005          |

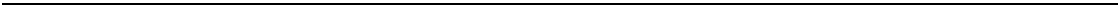

Supplement: ACM2-21-13-s001.pdf [file ACM2-21-13-s001.pdf]
